# Supplementary material
Source: PubMed Central journal article supplement (PMC2699364)

## **Supplementary information**

### **Supplementary methods**

#### ***INF- $\alpha$ induction***

PC3 cells were transfected with 100 nM siRNAs or left untreated. Cell culture supernatant was collected 72 h after transfection. INF- $\alpha$  in the supernatant was measured using the Flow Cytomix Human INF- $\alpha$  Simplex Kit (Bender MedSystems, Wien, Austria) according to the manufacturer's instructions. Human recombinant INF- $\alpha$  at concentrations ranging from 20,000 to 32 pg/ ml was used as control. INF- $\alpha$  concentrations were calculated using by FlowCytomix Pro 2.2 Software (Bender MedSystems GmbH, Wien, Austria).

## Supplementary Figure Legends

**Supplementary Figure S1. Activity of promoter-targeted siRNA in prostate cancer cells.** DU145 and LNCaP cells were transfected with 100nM of siRNAs and harvested after 72 h to evaluate *c-myc* mRNA by RT-PCR.

**Supplementary Figure S2. Lack of INF- $\alpha$  induction upon transfection of siRNAs.** PC3 cells were transfected with 100 nM of the indicated siRNAs or left untreated. Cell culture supernatant was collected 72 h and INF- $\alpha$  was measured using the Flow Cytomix Human INF- $\alpha$  Simplex Kit. Samples containing human recombinant INF- $\alpha$  were used as control. INF- $\alpha$  was undetectable in siRNA-treated cells.

**Supplementary Figure S3. Positive controls for chromatin pull-down with antibodies against K9 dimethylated and K27 trimethylated histone H3.** DNA immunoprecipitated with H3K9me2 and H3K27me3 antibodies was assessed by SYBR Green q-PCR with primers for the *c-myc*, p16 (*upper panel*) and RARB2 (*lower panel*) gene promoters. Data are normalized to the amount of input DNA.

**Supplementary Figure S4. Negative control reactions to exclude contamination with genomic DNA in the detection of promoter-associated transcripts.** RNA samples from PC3, DU145 and LNCaP cells were amplified by PCR (without RT step) in order to exclude DNA contamination. Genomic DNA and a DNA-free RNA sample are included as positive and negative control, respectively. NT, no template reaction.

**Supplementary Figure S5. Identification of promoter-associated transcripts in the *c-myc* promoter.** 5'RACE products were cloned and sequenced. The position of the 5' ends of the five cloned transcripts relative to the major *c-myc* TSS (P2) is indicated in the upper panel and their sequences are shown in the lower panel.

**Supplementary Figure S6. Selective knock-down of Ago1 and Ago2 in PC3 cells.** Cells were transfected with 100 nM of siRNAs and harvested after 48 h to isolate total RNA. Levels of Ago 1 and Ago2 were measured by RT-PCR.

**Supplementary Figure S7. Limited induction of apoptosis in siRNA transfected prostate cancer cells.** PC3 cells were harvested 4 days after transfection with siRNAs. Active caspase-3 and c-Myc levels were measured by FACS using PE-labeled anti-active caspase 3 and anti-c-Myc mouse monoclonal antibody followed by a FITC-labeled anti-mouse secondary antibody.

Table S1. Sequences of small interfering RNAs and antisense oligonucleotides.

| <b>Small interfering RNAs</b>     | <b>Sequence</b>                                               |
|-----------------------------------|---------------------------------------------------------------|
| Myc13                             | 5' -CGGGGCUUUAUCUAACUCGtt-3'<br>3' -ttGCCCCGAAUAGAUUGAGC-5'   |
| Myc13cm                           | 5' -CGGGGCUUGCGCUAACUCGtt-3'<br>3' -ttGCCCCGAACGCGAUUGAGC-5'  |
| Myc9                              | 5' -GCUUUAUCUAACUCGCUGUtt-3'<br>3' -ttCGAAAUAGAUUGAGCGACA-5'  |
| Myc24                             | 5' -AAGCCGGUUUUCGGGGCUUtt-3'<br>3' -ttUUCGGCCAAAAGCCCCGAA-5'  |
| Myc59                             | 5' -AAAAAGAACGGAGGGAGGGtt-3'<br>3' -ttUUUUUCUUGCCUCCCUCCC-5'  |
| GL3                               | 5' -CUUACGCUGAGUACUUCGAtt-3'<br>3' -ttGAAUGCGACUCAUGAAGCU-5'  |
| M3                                | 5' -CUGAGUAAGCGCGAUCUAAtt-3'<br>3' -ttGACUCAUUCGCGCUAGAUU-5'  |
| M4                                | 5' -CGGGUCUCUAUCUGACUAGtt-3'<br>3' -ttGCCCAGAGAUAGACUGAUC-5'  |
| M5                                | 5' -CGCGGAUUUAUCGAAGUCGtt-3'<br>3' -ttGCGCCUAAAUAGCUUCAGC-5'  |
| Ago1                              | 5' -GAGAAGAGGUGCUC AAGAAuu-3'<br>3' -uuCUCUUCUCCACGAGUUCUU-5' |
| Ago2                              | 5' -GCACGGAAGUCCAUCUGAAUU-3'<br>3' -uuCGUGCCUUCAGGUAGACUU-5'  |
| <b>Antisense Oligonucleotides</b> |                                                               |
| ASO                               | 5' -TTATACTCAGCGGATCCCT-3'                                    |
| Scrambled ASO                     | 5' -TCCCTCGCGACTCAGTTATA-3'                                   |

Table S2. Primers sets used for RT-PCR, nuclear run-on, ChIP, biotin pull-down, qPCR and 5'RACE.

| Primer set             | Primers            | Sequence                                                       | Applications                     |
|------------------------|--------------------|----------------------------------------------------------------|----------------------------------|
| Myc/exon2/3            | Forward<br>Reverse | 5'-ggtggtcttcccctaccctctcaa-3'<br>5'-ggcagcaggatagtccttccg-3'  | RT-PCR                           |
| $\beta$ -Actin         | Forward<br>Reverse | 5'-aagagaggcatcctcaccct-3'<br>5'-tacatggctggggtggtgaa-3'       | RT-PCR                           |
| hTERT                  | Forward<br>Reverse | 5'-tctggatttgacaggtgaacagcc-3'<br>5'-gggtggccatcagtcaggatgg-3' | RT-PCR                           |
| Ago1                   | Forward<br>reverse | 5'-gcactgccattggcaacgaa-3'<br>5'-cattcgccagctcacaatggct-3'     | RT-PCR                           |
| Ago2                   | Forward<br>Reverse | 5'-cgcgtccgaaggtgctcta-3'<br>5'-tggctgtgccttgtaaacgct-3'       | RT-PCR                           |
| GAPDH                  | Forward<br>Reverse | 5'-ggctgtgggcaaggtcatccc-3'<br>5'-tccaccaccctgttgctgta-3'      | Nuclear run on                   |
| Myc/exon1              | Forward<br>Reverse | 5'-ggcactttgactggaactt-3'<br>5'-gcaaggagagcctttcagag-3'        | Nuclear run-on                   |
| Myc/-83/+124           | Forward<br>Reverse | 5'-agggtctctcagaggcttg-3'<br>5'-cctattcgctccggatctc-3'         | ChIP, RT-PCR<br>Biotin pull-down |
| Myc/-217/-75           | Forward<br>Reverse | 5'-aagatcctctctcgctaattctcc-3'<br>5'-agaagccctgcccttctc-3'     | ChIP, RT-PCR                     |
| Myc/+220/+403          | Forward<br>Reverse | 5'-ggcactttgactggaactt-3'<br>5'-ggtgcttacctggttttcca-3'        | ChIP                             |
| Myc/-44/+68            | Forward<br>Reverse | 5'-agggatcgcggtgagtataa-3'<br>5'-ggctcttccaccctagcc-3'         | Biotin pull-down                 |
| Myc/-217/+124          | Forward<br>Reverse | 5'-aagatcctctctcgctaattctcc-3'<br>5'-cctattcgctccggatctc-3'    | RT-PCR                           |
| Myc/-374/-75           | Forward<br>Reverse | 5'-catgcggtctcttactctg-3'<br>5'-agaagccctgcccttctc-3'          | RT-PCR                           |
| Myc/mRNA               | Forward<br>Reverse | 5'-ggtgctccatgaggagaca-3'<br>5'-cctgcctcttttccacagaa-3'        | Real time PCR                    |
| Myc/paRNA<br>-226/-158 | Forward<br>Reverse | 5'-aagatcctctctcgctaattctcc-3'<br>5'-ggtcctcagcctgtccaga-3'    | Real time PCR                    |
| Myc/P2                 | Forward<br>Reverse | 5'-agggatcgcgctgagtataa-3'<br>5'-tgcctctcgctggaattact-3'       | Real time RT-PCR                 |
| $\beta$ -Actin         | Forward<br>Reverse | 5'-aactggctcaagtcaagtgtacagg-3'<br>5'-tcccccaacttgagatgtatg-3' | Real time PCR                    |
| RAR $\beta$ 2          | Forward<br>Reverse | 5'-GCACGTAGGCTGTTGGTCTTT-3'<br>5'-GCTGGCTTGTCTGTCATAATTCA-3'   | Real time PCR                    |
| p16                    | Forward<br>Reverse | 5'-TCCTGAAAATCAAGGGTTGAG-3'<br>5'-GCAAACTATTCTTTCTAGTTGTGA-3'  | Real time PCR                    |
| GSP1 -202              | Reverse            | 5'-CGGAGATTAGCGAGAGAGGA-3'                                     | 5'RACE                           |
| GSP2 -297              | Reverse            | 5'-GGAAGGTGGGGAGGAGACT-3'                                      | 5'RACE                           |
| GSP3 -333              | Reverse            | 5'-CAGCCGAGCACTCTAGCTCT-3'                                     | 5'RACE                           |

# Supplementary Figure S1

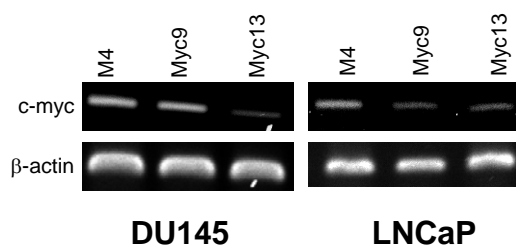

## Supplementary Figure S2

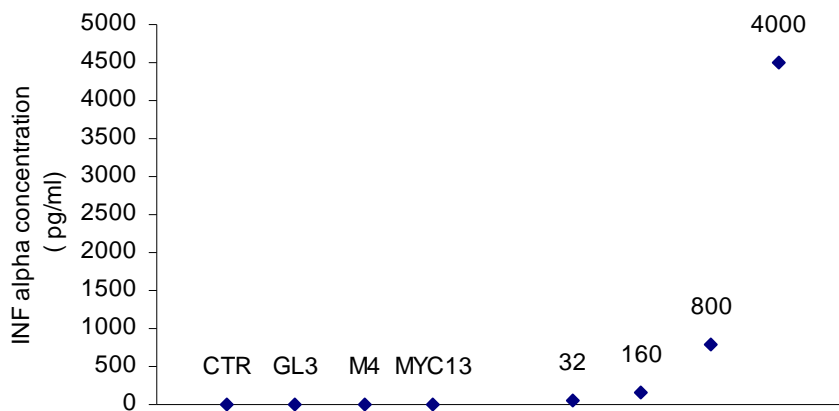

| SAMPLE NAME | NOMINAL VALUE pg/ml | MEASURED VALUE pg/ml |
|-------------|---------------------|----------------------|
| ST.1        | 32                  | 64.65                |
| ST.2        | 160                 | 150.71               |
| ST.3        | 800                 | 793.49               |
| ST.4        | 4000                | 4487.92              |
| ST.5        | 20000               | 16391.89             |
| CTR         | unknown             | not detectable       |
| GL3         | unknown             | not detectable       |
| M4          | unknown             | not detectable       |
| MYC13       | unknown             | not detectable       |

# Supplementary Figure S3

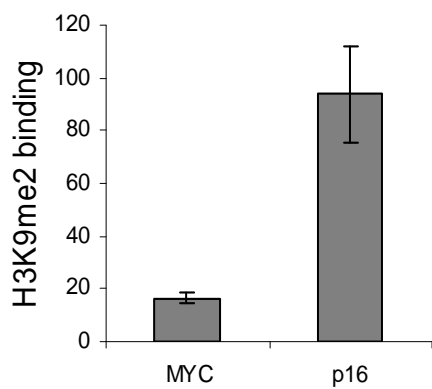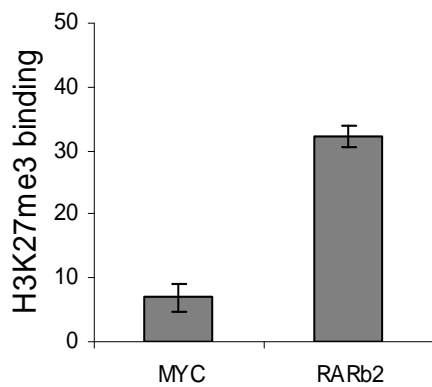

# Supplementary Figure S4

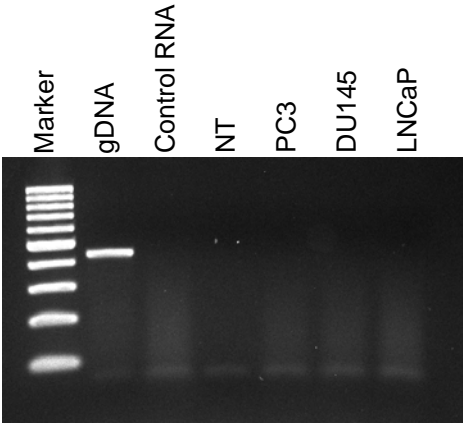



# Supplementary Figure S5

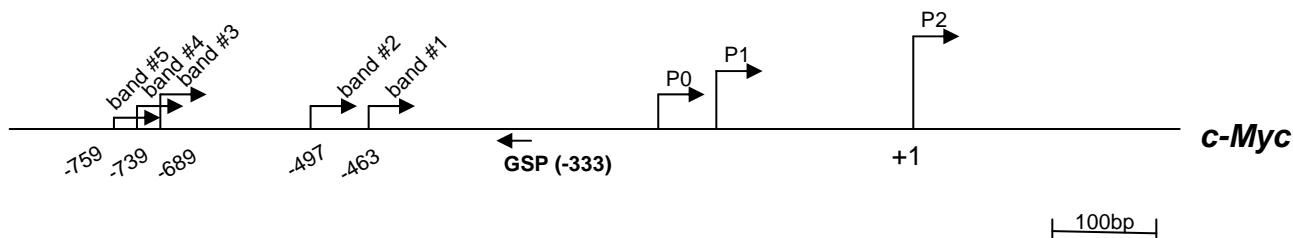

| Fragment | Sequence of cloned fragment                                                                                                                                                                                                                                                                                                                                                                                                                                                 | Position relative to P2 site |
|----------|-----------------------------------------------------------------------------------------------------------------------------------------------------------------------------------------------------------------------------------------------------------------------------------------------------------------------------------------------------------------------------------------------------------------------------------------------------------------------------|------------------------------|
| Band #1  | GTCAAACAGTACTGCTACGGAGGAGCAGCAGAGAAAAGGGAGAGGGTTTGAGAGGGAG<br>CAAAAGAAAATGGTAGGCGCGCGTAGTTAATTCATGCGGCTCTTACTCTGTTTACAT<br>CCTAGAGCTAGAGTGCTCGGCTG                                                                                                                                                                                                                                                                                                                          | -463                         |
| Band #2  | GTGATGATTTATACTCACAGGACAAGGATGCGGTTTGTCAAAACAGTACTGCTACGGAG<br>GAGCAGCAGAGAAAAGGGAGAGGGTTTGAGAGGGAGCAAAAGAAAATGGTAGGCGCGC<br>GTAGTTAATTCATGCGGCTCTTACTCTGTTTACATCCTAGAGCTAGAGTGCTCGGCTG<br>A                                                                                                                                                                                                                                                                                | -497                         |
| Band #3  | ATCTACTAATAACATCCCACGCTCTGAACGCGCGCCATTAATACCCTTCTTTCCTCCAC<br>TCTCCCTGGGACTCTTGATCAAAGCGCGGCCCTTTCCCAGCCTTAGCGAGGCGCCCTG<br>CAGCCTGGTACGCGCGTGGCGTGGCGGTGGCGCGCAGTGCGTTCTCGGTGTGGAGGG<br>CAGCTGTCCGCCTGCGATGATTTATACTCACAGGACAAGGATGCGGTTTGTCAAAACAG<br>TACTGCTACGGAGGAGCAGCAGAGAAAAGGGAGAGGGTTTGAGAGGGAGCAAAAGAAA<br>ATGGTAGGCGCGCTNGTTAATTCATGCGGCTCTCTNNCNCNNNTACNNCCTAGAGCT<br>AGAGTGNTCGGCTG                                                                          | -689                         |
| Band #4  | ATCATTCCTCCCTATCTACTAATAACATCCCACGCTCTGAACGCGCGCCATTAATACC<br>TCTTTCCTCCACTCTCCCTGGGACTCTTGATCAAAGCGCGGCCCTTTCCCAGCCTTAG<br>CGAGGCGCCCTGCAGCCTGGTACGCGCGTGGCGTGGCGGTGGCGCGCAGTGCGTTCT<br>CGGTGTGGAGGGCAGCTGTCCGCCTGCGATGATTTATACTCACAGGACAAGGATGCG<br>GTTTGTCAAAACAGTACTGCTACGGAGGAGCAGCAGAGAAAAGGGAGAGGGTTTGAGAG<br>GGAGCAAAAGAAAATGGTAGGCGCGCGTAGTTAATTCATGCGGCTCTTACTCTGTTT<br>ACATCCTAGAGCTAGAGTGCTCGGCTG                                                               | -739                         |
| Band #5  | TGAATGCGTTGCTGGGTTATTTTAAATCATTCTAGGCATCGTTTTCCTCTTATGCCTCTA<br>TCATTCTCCCTATCTACTAATAACATCCCACGCTCTGAACGCGCGCCATTAATACCCT<br>TCTTTCCTCCACTCTCCCTGGGACTCTTGATCAAAGCGCGGCCCTTTCCCAGCCTTAG<br>GAGGCGCCCTGCAGCCTGGTACGCGCGTGGCGTGGCGGTGGCGCGCAGTGCGTTCTC<br>GGTGTGGAGGGCAGCTGTCCGCCTGCGATGATTTATACTCACAGGACAAGGATGCGG<br>TTTGTCAAAACAGTACTGCTACGGAGGAGCAGCAGAGAAAAGGGAGAGGGTTTGAGAGG<br>GAGCAAAAGAAAATGGTAGGCGCGCGTAGTTAATTCATGCGGCTCTTACTCTGTTT<br>CATCCTAGAGCTAGAGTGCTCGGCTG | -759                         |

# Supplementary Figure S6

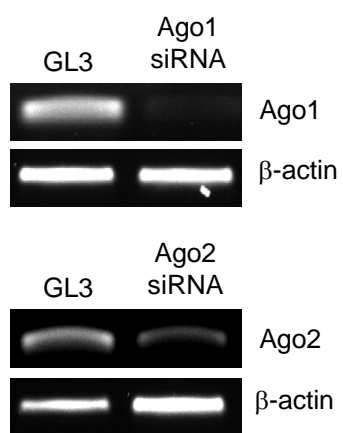

# Supplementary Figure S7

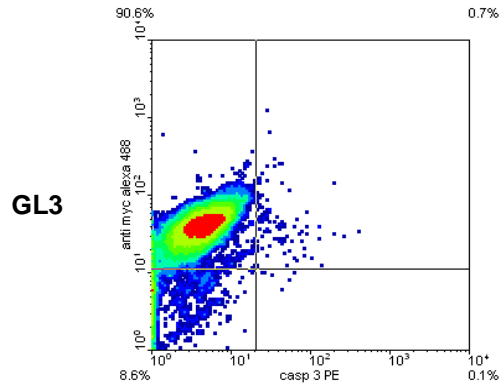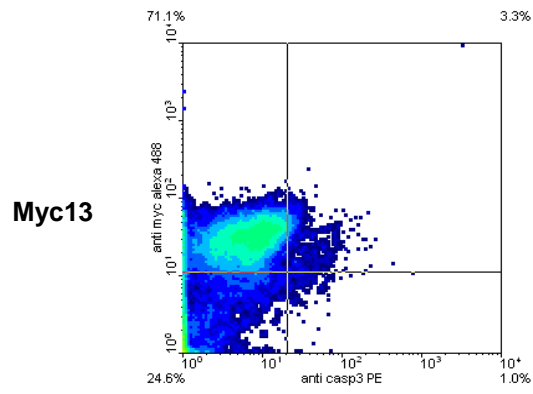

Supplement: emboj2009139s1.pdf [file emboj2009139s1.pdf]
